# Supplementary material for: Surface formation, preservation, and history of low-porosity crusts at the WAIS Divide site, West Antarctica
Source: Copernicus journal article supplement (doi:10.5194/tc-12-325-2018), 2018-01-26
Supplement: Supplementary file 1 [file tc-12-325-2018-supplement.pdf]

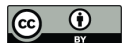

*Supplement of*

**Surface formation, preservation, and history of low-porosity crusts  
at the WAIS Divide site, West Antarctica**

**John M. Fegyveresi et al.**

*Correspondence to:* John M. Fegyveresi (fegy.john@gmail.com)

The copyright of individual parts of the supplement might differ from the CC BY 3.0 License.

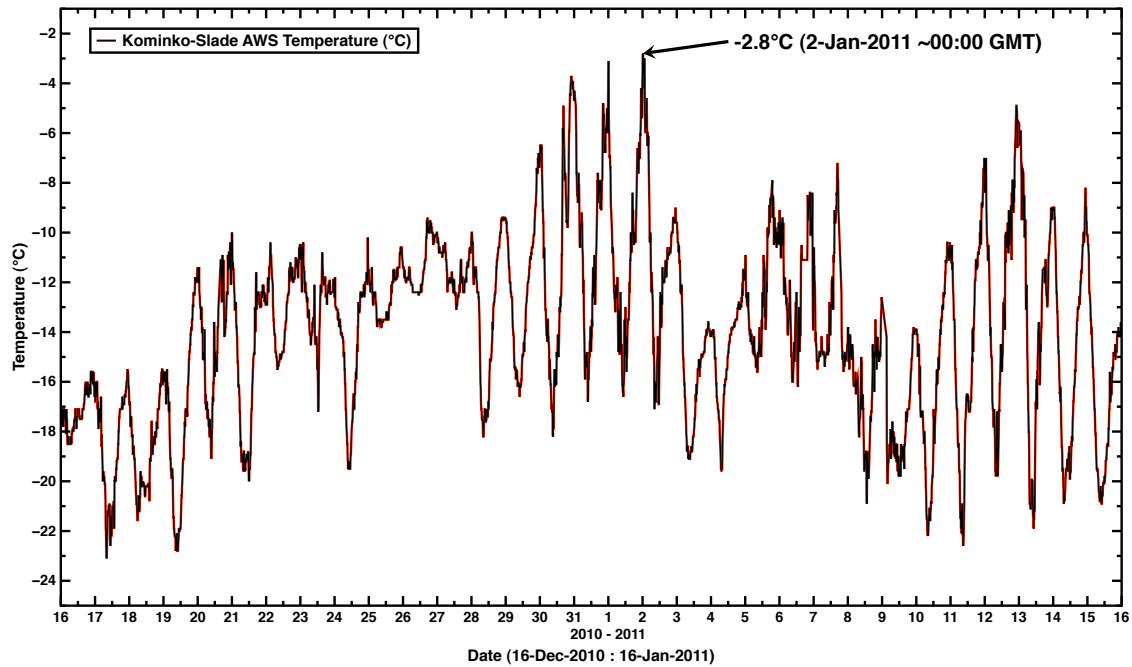

**Figure S1:** Automated weather station (Kominko-Slade) temperature data for WAIS Divide measured during the 2010-11 season. Temperature data are shown for the peak summertime period of Dec 16<sup>th</sup> – Jan 15. The peak of -2.8°C on Jan 2<sup>nd</sup> was the highest observed during our study interval (see also Fig. 6).

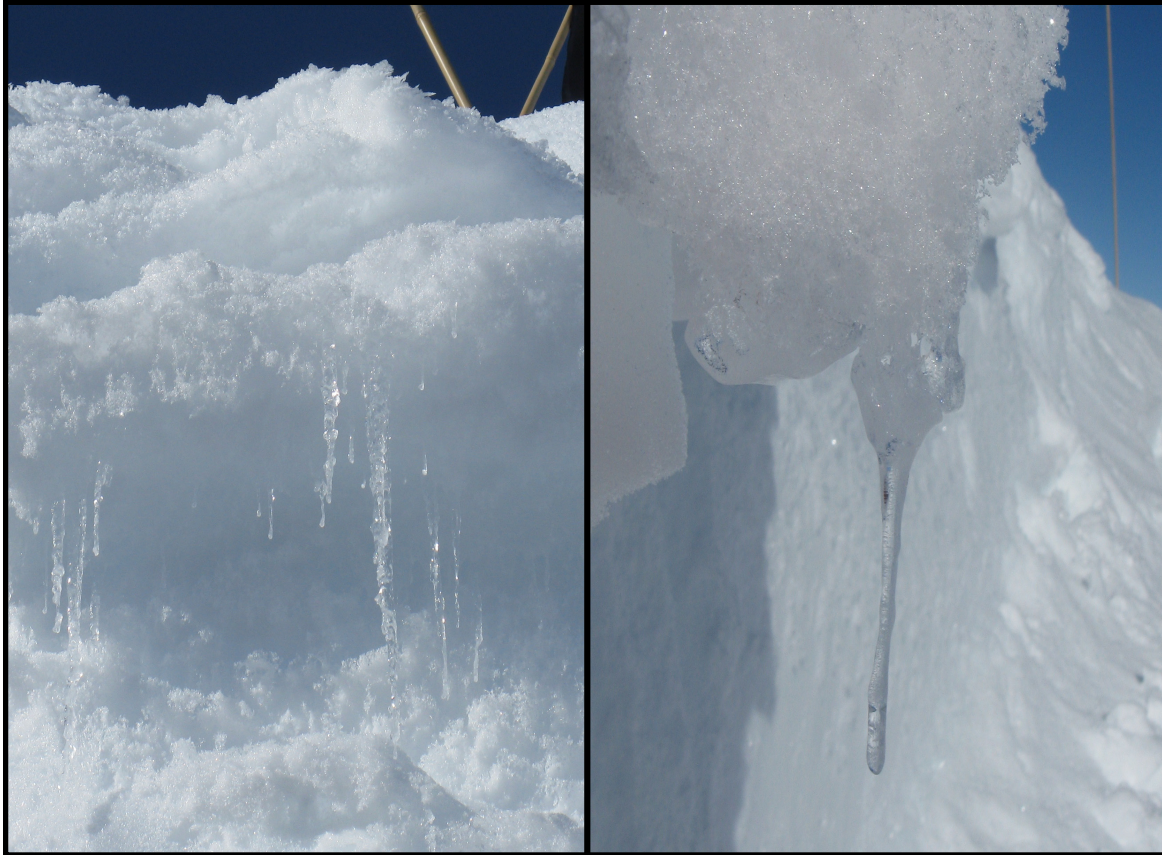

**Figure S2:** Photographs showing melt on disturbed, steep surfaces near the ice-core drilling facility during the 2-Jan-2011 extreme warm episode at WAIS Divide. Limited melting may have occurred beneath nearly horizontal, undisturbed surfaces away from the station.

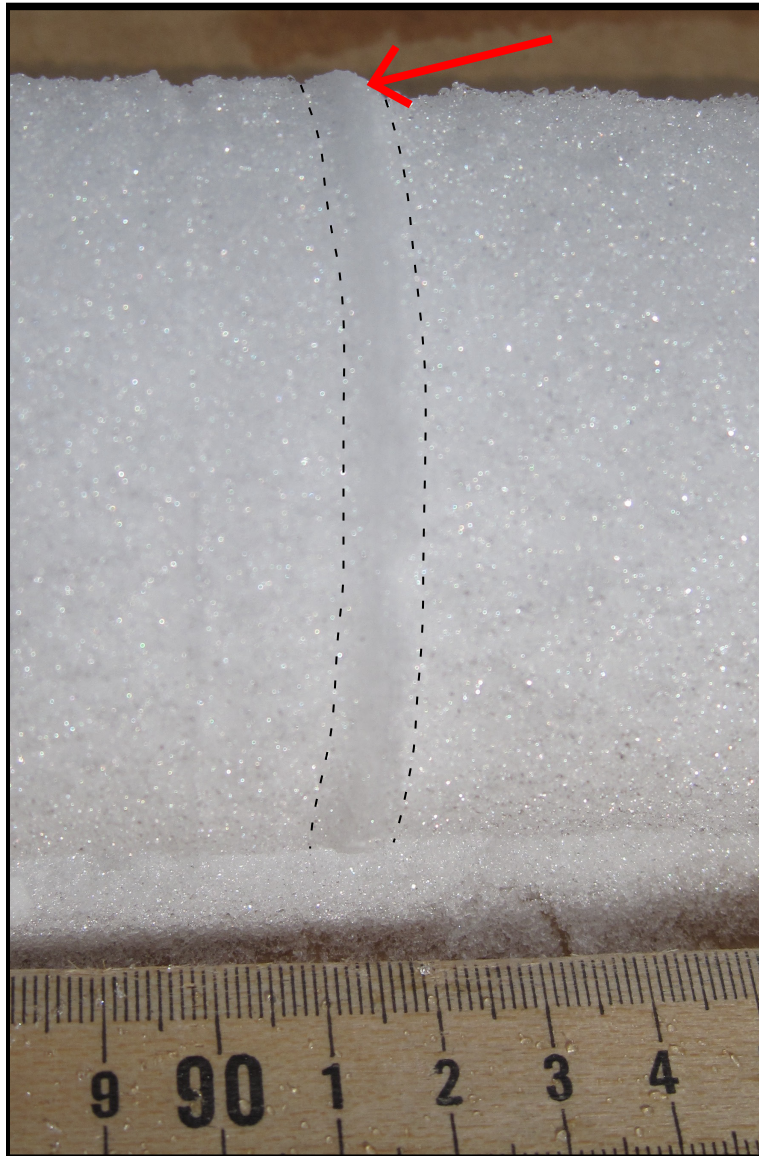

**Figure S3:** A 5+ mm crust or refrozen melt layer in a shallow firn core drilled during the 2011-12 WAIS Divide field season. Based upon its depth below the surface (~91 cm) and known accumulation rates for the area, this crust developed during the peak of the previous summer season (2010-2011).

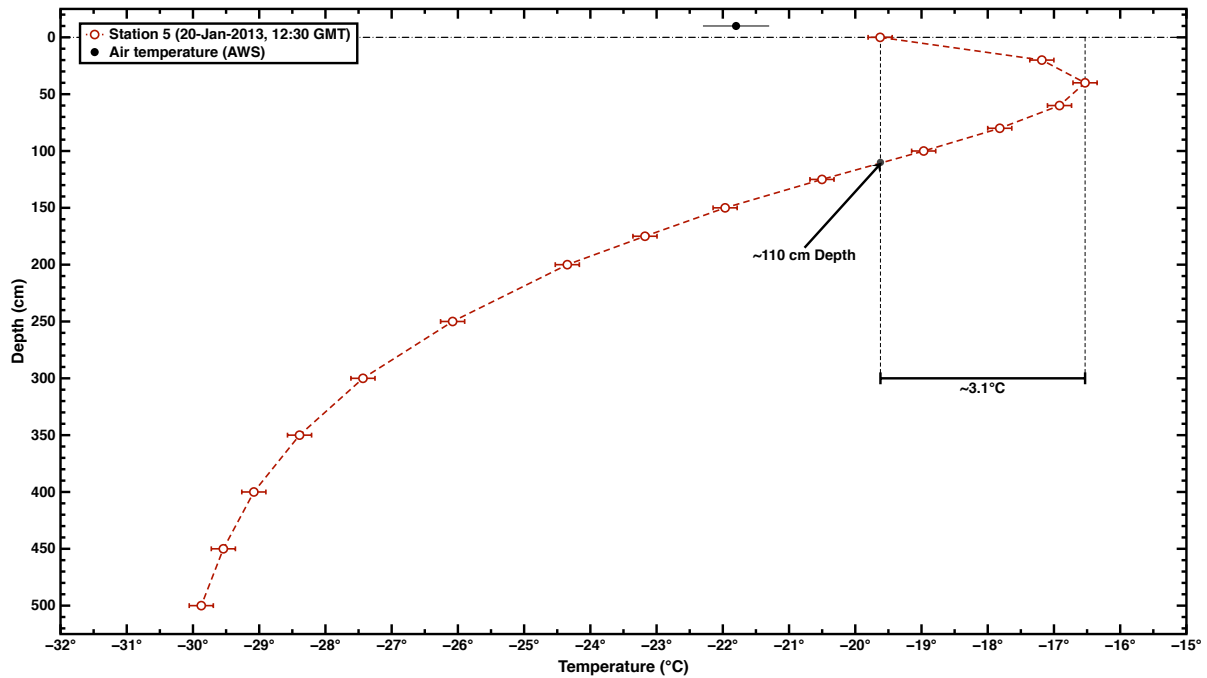

**Figure S4:** Firn-temperature data at station 5 at 12:30 GMT on 20-Jan-2013, when the largest subsurface temperature inversion was observed from the 2012-13 season (surface 3.1°C colder than the subsurface temperature maximum at 40 cm depth, with the surface approximately the same temperature as 110 cm). Air temperature recorded at the AWS (Kominko-Slade) was ~5°C colder than the subsurface temperature maximum.

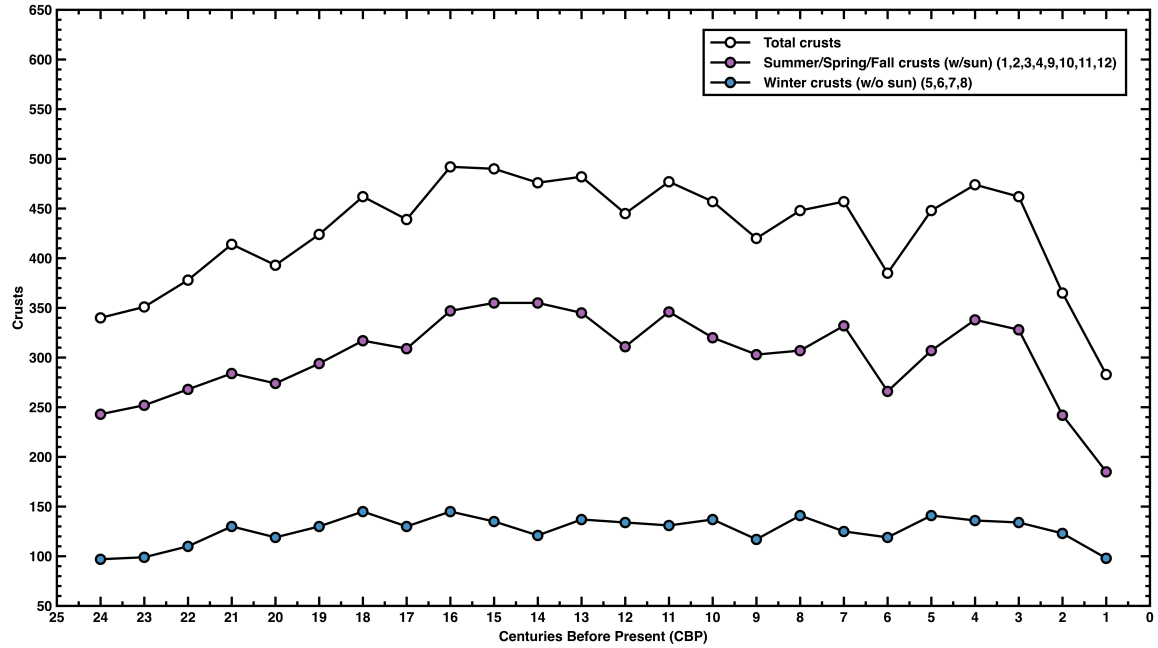

**Figure S5:** Crusts per century, for the 4-month “dark winter” (May-Aug), 8-month “summer/fall/spring” (Sep-Apr), and total. The larger changes in sunlight and total histories suggest a possible role for insolation. Crusts were bracketed 24 one-hundred-year bins starting with the most current year of 2007 (i.e. 2007-1907, 1907-1807, etc).



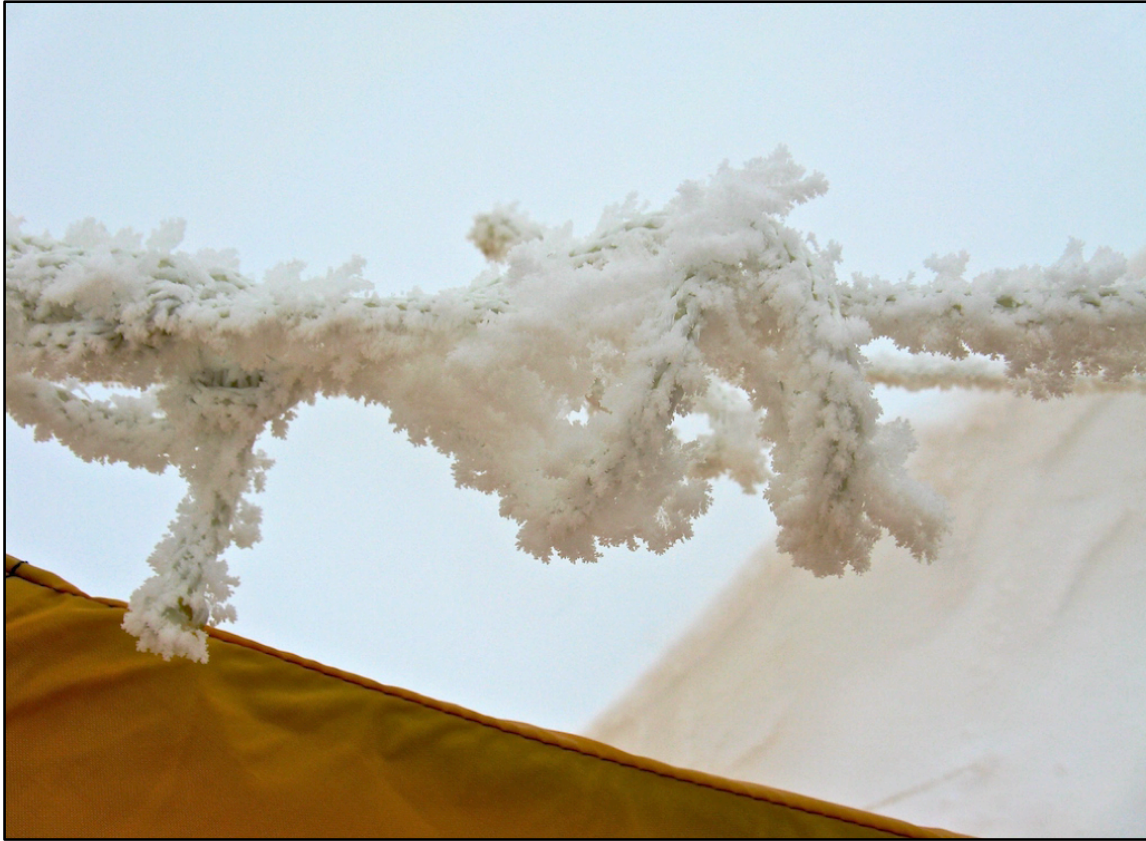

**Figure S6:** Faceted hoar growth on tent guylines that occurred during a heavy fog episode between Dec 30-31, 2009, at WAIS Divide (see also Fig. 5).

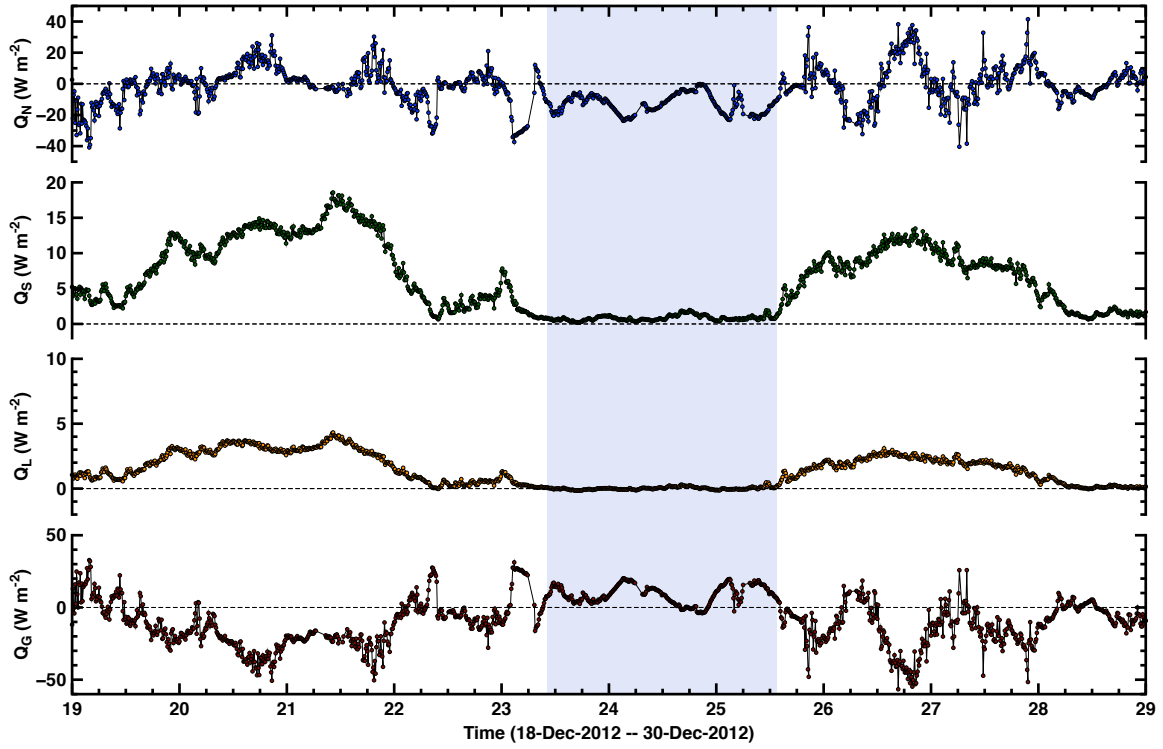

**Figure S7:** Surface energy budget over 10 days of the 2012-13 season. Shading highlights the ~48-hr period with episodes of glaze formation, polygonal cracking, and surface hoar formation (see also Figure 8). Total net radiation ( $Q_N$ ), turbulent sensible heat flux ( $Q_S$ ), turbulent latent heat flux ( $Q_L$ ) and calculated ground heat flux ( $Q_G$ ) are shown. Dashed lines in all plots indicate zero values. All dates and times are GMT (-12 WAIS local time).



**Table S1:** Kominko-Slade (AWS) published errors.

| Sensor         | Resolution  | Accuracy      |
|----------------|-------------|---------------|
| Temperature    | 0.125°C     | ± 0.3         |
| Humidity       | 1.0%        | ± 5.0%        |
| Wind Speed     | 0.20 m/s    | ± 0.5 m/s     |
| Wind Direction | 1.5 Degrees | ± 3.0 Degrees |

**Table S2:** PRD constants (RTD, HEL-700 Series).

| Variable                               | 1 <sup>st</sup> Level    | 2 <sup>nd</sup> Level      |
|----------------------------------------|--------------------------|----------------------------|
| Alpha ( $\alpha$ ) (°C <sup>-1</sup> ) | 0.00375 ± 0.000029       | 0.003850 ± 0.000010        |
| Delta ( $\delta$ ) (°C)                | 1.605 ± 0.009            | 1.4999 ± 0.007             |
| Beta ( $\beta$ ) (°C)                  | 0.16                     | 0.10863                    |
| A (°C <sup>-1</sup> )                  | 3.81 x 10 <sup>-3</sup>  | 3.908 x 10 <sup>-3</sup>   |
| B (°C <sup>-2</sup> )                  | -6.02 x 10 <sup>-7</sup> | -5.775 x 10 <sup>-7</sup>  |
| C (°C <sup>-4</sup> )                  | -6.0 x 10 <sup>-12</sup> | -4.183 x 10 <sup>-12</sup> |

**Table S3:** PRD string installation details and notes.

| Station ID         | Dist. from Station 1 | Date Installed | Latitude    | Longitude    |
|--------------------|----------------------|----------------|-------------|--------------|
| Station 1 (Origin) | 0 m                  | 15-Dec-2012    | -79.463894° | -112.110625° |
| Station 2          | 10 m                 | 15-Dec-2012    | -79.463804° | -112.110640° |
| Station 3          | 100 m                | 19-Dec-2012    | -79.463004° | -112.111204° |
| Station 4          | 1000 m               | 22-Dec-2012    | -79.455013° | -112.120247° |
| Station 5          | 2000 m               | 25-Dec-2012    | -79.446509° | -112.137542° |
| Kominko-Slade AWS  | -50 m                | 01-Dec-2008    | -79.466000° | -112.106000° |

### HEL-700 PRD Functional Behavior and and Constants

**Equation S1:** 
$$R_T = R_0(1 + AT + BT^2 - 100CT^3 + CT^4)$$

Where,

$R_T$  = Resistance ( $\Omega$ ) at Temperature T (°C)

$R_0$  = Resistance ( $\Omega$ ) at 0°C

T = Temperature in °C

A =  $\alpha + \alpha \delta$

B =  $-\alpha \delta$

$C_{T<0}$  =  $-\alpha \beta$
